1  
2  
3  
4  
5  
6  
7  
8  
9  
10  
11  
12  
13  
14  
15  
16  
17  
18  
19  
20  
21  
22  
23

Identifying the barriers and facilitators to culturally responsive HIV and PrEP screening for racial, ethnic, sexual, and gender minoritized patients: A scoping review protocol

Julia Xavier<sup>1¶</sup>, Patrick G. Corr<sup>1\*¶</sup>, Maranda C. Ward<sup>1¶</sup>, Nikhil Kalita<sup>2¶</sup>, Paige McDonald<sup>1¶</sup>

<sup>1</sup>The George Washington University School of Medicine and Health Sciences, Washington, D.C., USA

<sup>2</sup>The George Washington University Milken School of Public Health, Washington, D.C., USA

\*Corresponding Author, email: [pcorr@gwu.edu](mailto:pcorr@gwu.edu) (PGC); 2600 Virginia Avenue NW, Suite 300, Washington DC, 20037

24 **Abstract**

25 **Introduction:** While mainstream messaging about human immunodeficiency virus (HIV)  
26 disparities continues to highlight individual risk-taking behavior among historically marginalized  
27 groups, including racial, ethnic, sexual, and gender minoritized patients, the effect of structural  
28 factors and social determinants of health (SDOH) on morbidity and mortality remain  
29 underestimated. Systemic barriers, including a failure of adequate and acceptable screening, play  
30 a significant role in the disparate rates of disease. Primary care practitioner (PCP) competency in  
31 culturally responsive screening practices is key to reducing the impact of structural factors on  
32 HIV rates and outcomes. To address this issue, a scoping review will be performed to inform the  
33 development of a training series and social marketing campaign to improve the competency of  
34 PCPs in this area.

35 **Objectives:** This scoping review aims to analyze what recent literature identify as facilitators  
36 and barriers of culturally responsive HIV and pre-exposure prophylaxis (PrEP) screening  
37 practices for historically marginalized populations, specifically racial, ethnic, sexual, and gender  
38 minoritized groups. A secondary aim is to identify themes and gaps in the literature to help guide  
39 future opportunities for research.

40 **Methods:** This scoping review will be performed following the framework set forth by Arksey  
41 and O'Malley and the Preferred Reporting Items for Systematic Reviews and Meta-Analyses  
42 extension for scoping reviews (PRISMA-ScR). Relevant studies between the years 2019-2022  
43 will be identified using a rigorous search strategy across four databases: MEDLINE (via  
44 PubMed), Scopus, Cochrane (CENTRAL; via Wiley), and CINAHL (via EBSCO), using  
45 Boolean and Medical Subject Headings (MeSH) search terms. Studies will be uploaded to the

46 data extraction tool Covidence to remove duplicates and perform a title/abstract screening,  
47 followed by a full-text screening and data extraction.

48 **Results:** Data will be extracted and analyzed for themes related to culturally responsive HIV and  
49 PrEP screening practices in clinical encounters with the identified target populations. Results  
50 will be reported according to PRISMA-ScR guidelines.

51 **Discussion:** To our knowledge, this is the first study to use scoping methods to investigate  
52 barriers and facilitators to culturally responsive HIV and PrEP screening practices for racial,  
53 ethnic, sexual, and gender minoritized populations. The limitations of this study include the  
54 analysis restrictions of a scoping review and the timeframe of this review. We anticipate that this  
55 study's findings will interest PCPs, public health professionals, community activists, patient  
56 populations, and researchers interested in culturally responsive care. The results of this scoping  
57 review will inform a practitioner-level intervention that will support culturally sensitive quality  
58 improvement of HIV-related prevention and care for patients from minoritized groups.  
59 Additionally, the themes and gaps found during analysis will guide future avenues of research  
60 related to this topic.

61 **Keywords:** culturally responsive communication, primary care practitioners, quality of  
62 healthcare, historically marginalized populations

63

## 64 **Introduction**

65 Central to the effective care of historically excluded communities is an appreciation for  
66 cultural responsiveness, sometimes called cultural competence, among primary care practitioners  
67 (PCPs). In the context of primary care, culturally responsive communication refers to a PCP's  
68 ability to engage with patients “based on views of culturally diverse patients rather than the  
69 views of health care professionals.”<sup>1</sup> Cultural responsiveness centers unique patient experiences  
70 and understandings of health and illness, recognizes the individual biases that clinicians may  
71 hold, and seeks to work productively with patients who are not typically represented or valued in  
72 the Western understandings of care. At an organizational level, cultural responsiveness includes  
73 valuing diversity within the community; institutionalizing cultural awareness; and adapting to  
74 best serve the community by creating policies, systems, administrations, and protocols that allow  
75 for effective cross-cultural interactions.<sup>2</sup> This type of approach allows healthcare practitioners to  
76 work consciously and effectively toward cultivating health equity for historically marginalized  
77 groups.

78 Human immunodeficiency virus (HIV) and coronavirus disease 2019 (COVID-19), for  
79 instance, are two preventable, communicable illnesses with significant burdens of disease that  
80 are highly stigmatized and disproportionately affect racial, ethnic, sexual and gender minoritized  
81 groups, hereafter referred to as “minoritized groups”. Structural factors including systemic  
82 oppression and social determinants of health (SDOH) play a significant role in the differential  
83 health outcomes of these diseases but may receive less attention than a patient's personal factors  
84 and choices. In the landscape of these existing disparities, patients from minoritized groups are  
85 disproportionately harmed by the underutilization of culturally responsive screening practices in  
86 the primary care setting. Further, while shifts in research and funding priorities allowed for swift

87 and large-scale responses to COVID-19, the recent pandemic has drawn much needed resources  
88 and attention away from HIV prevention and care, exacerbating the disparities of this illness and  
89 creating missed opportunities to address both diseases.<sup>3</sup>

90 To address these issues, the study team is undertaking a project to train and build the  
91 capacity of PCPs to routinize culturally responsive and nonjudgmental communication about  
92 screening and testing for minoritized groups regarding HIV and COVID-19. By providing  
93 regular, culturally responsive screening and education related to COVID-19 and HIV, PCPs can  
94 begin to bridge the divide in health disparities impacting minoritized communities. This project  
95 is multifaceted and includes data collection through scoping literature reviews and qualitative  
96 interviews that concern the experiences and beliefs of minoritized groups regarding HIV and  
97 COVID-19. These data will be used to inform and validate: a) a training series for PCPs about  
98 HIV testing, pre-exposure prophylaxis (PrEP) screening, and COVID-19 vaccine screening; b) a  
99 social marketing campaign for PCPs and by PCPs to encourage routinizing culturally responsive  
100 conversations about testing, screening, and prevention; and c) a culminating white paper on  
101 policy recommendations to improve HIV screening guidelines and to better implement existing  
102 PrEP and COVID-19 guidelines. This article discusses the protocol that will be used to perform a  
103 scoping review focused on HIV and PrEP screening, specifically.

## 104 **Background**

105 Despite progress over the last forty years in reducing HIV transmission, morbidity, and  
106 mortality, nearly 1.2 million people are still living with HIV in the United States according to  
107 most recent data.<sup>4</sup> Among those living with and becoming newly infected with HIV, minoritized  
108 groups deal with a greater burden of disease. For example, male-to-male sexual encounters made  
109 up more than two-thirds of HIV diagnoses in 2020,<sup>4</sup> and a 2021 CDC special report found that 4

110 in 10 transgender women in major cities are living with HIV.<sup>5</sup> Similarly, although Black  
111 Americans made up only 13.6% of the U.S. population in 2020, they represented more than 40%  
112 of HIV diagnoses that year.<sup>4,6</sup> The same year, Hispanic or Latinx individuals made up 27% of  
113 HIV diagnoses, despite making up less than 19% of the U.S. population.<sup>4,6</sup> Despite mainstream  
114 messaging that still claims these populations are more often engaged in high-risk behaviors,  
115 research data support that structural and systemic issues like socioeconomic status, housing, the  
116 physical environment, and unequal access to preventative care have contributed to these stark  
117 health disparities more significantly than individual risk behaviors.<sup>3</sup>

118         Among those living with HIV, more than 1 in 10 are not aware of their HIV status  
119 because they have not been tested.<sup>7</sup> Without an understanding of their HIV status and risk, these  
120 patients may be unable to start pre- or post-exposure prophylaxis (PrEP or PEP) or the  
121 appropriate therapies to suppress their viral load. Following the current trajectory, without  
122 further intervention, close to 400,000 more people will be diagnosed with HIV by 2030.<sup>8</sup> For  
123 these reasons, HIV prevention and diagnosis are central to the U.S. Department of Health and  
124 Human Services (HHS) *Ending the HIV Epidemic in the U.S.* plan for the next decade. The HHS  
125 plan aims to reduce new HIV infections by over 90% by 2030.<sup>8</sup> PrEP coverage, a key indicator  
126 of *Ending the HIV Epidemic in the U.S.*, shows a distinct failing. Current US Public Health  
127 Service PrEP clinical practice guidelines recommend that all sexually active patients receive  
128 information regarding PrEP and that those at substantial risk should be prescribed either daily  
129 oral PrEP or a recently approved intramuscular injection every two months.<sup>9</sup> Despite this, in  
130 2020, only 1 in 4 people in the U.S. and Puerto Rico who had indications for PrEP were  
131 receiving PrEP.<sup>10</sup> Among these individuals, the aforementioned racial and ethnic disparities

132 persist: while 66% of indicated White patients were covered, only 9% of indicated Black patients  
133 and only 16% of indicated Hispanic or Latinx patients were receiving PrEP.<sup>10</sup>

134 Moreover, while the Centers for Disease Control and Prevention (CDC) has  
135 recommended for more than 15 years that routine healthcare include opt-out HIV screening  
136 (defined as performing an HIV test) at least once for patients between the ages of 13 and 64, and  
137 at least annually for patients with risk factors,<sup>11</sup> qualitative data from other arms of this study  
138 have already indicated that minoritized patients not only feel targeted and disrespected by HIV  
139 testing without context, but they report concerns that opt-out testing is or will be performed  
140 without their consent. These feelings exacerbate the mistrust that historically exploited groups  
141 have of healthcare practitioners and institutions. Even without this barrier, testing rates have not  
142 increased ubiquitously throughout the healthcare system. A 2020 Morbidity and Mortality  
143 Weekly Report by the CDC reported that HIV testing has been increasing in community health  
144 centers and emergency department settings, but not in physician offices.<sup>12</sup>

145 The above metrics support the idea that a chronic underutilization of HIV screening and  
146 prevention practices, especially in the primary care setting, misses a crucial health promotion  
147 opportunity, and disproportionately harms members of historically marginalized groups due to  
148 the systemic barriers that exist within healthcare and societal institutions. It is the responsibility  
149 of PCPs to understand these barriers and to identify the impacts of structural racism on the poor  
150 outcomes and delayed identification of HIV in minoritized groups so they may prioritize  
151 culturally responsive communication with these patient populations. The definition of HIV  
152 screening must expand to include these conversations about HIV and PrEP to conscientiously  
153 serve historically marginalized patients. Moving forward, we use the term “screening” to indicate

154 screening conversations and communication practices among PCPs that facilitate informed HIV  
155 testing and connection to PrEP.

156 To begin meeting these aims and the study goals outlined above, we will conduct a  
157 scoping review to assess existing literature for insights about this topic. To our knowledge, there  
158 has not yet been a scoping review regarding this subject and the target patient populations. A  
159 preliminary search of databases identified no ongoing or existing systematic/scoping reviews on  
160 this topic. Therefore, the scoping review will be conducted with two specific purposes. Firstly, to  
161 inform our understanding of the factors which influence culturally responsive HIV and PrEP  
162 screening conversations for historically marginalized populations. The results of this review will  
163 inform the design of a training series and social marketing campaign targeted at PCPs. Secondly,  
164 the review will identify themes and gaps in the current literature to guide future research  
165 opportunities in this field.

## 166 **Timeline**

167 This scoping review was designed in October 2022, reviewed with members of the  
168 research team, and shared with university reference librarians for initial feedback. Data  
169 extraction and analysis will begin in late January 2023 and continue through March 2023. We  
170 anticipate submitting the results of this scoping review for publications in March 2023.

## 171 **Methods**

172 Scoping reviews differ from systematic reviews in that they focus on reviewing the  
173 breadth, rather than depth of current literature regarding a particular topic. For this reason, they  
174 may be completed much more rapidly than systematic reviews, which take time to assess the  
175 quality of evidence among studies. A scoping review was chosen to quickly ascertain the nature



176 of the knowledge base surrounding factors that influence culturally responsive HIV and PrEP  
177 screening for patients identifying as members of minoritized groups.

178 The scoping review will be performed according to the framework first outlined by  
179 Arksey and O'Malley.<sup>13</sup> The five steps of this process include: 1) identifying a research question,  
180 2) identifying relevant studies, 3) selecting studies, 4) charting the data, and 5) collating,  
181 summarizing, and reporting the results. This will also be guided by the specific steps of the  
182 PRISMA extension for scoping reviews (PRISMA-ScR),<sup>14</sup> several of which will be described in  
183 relevant sections below.

#### 184 **Step 1: Identifying a research question**

185 The primary research question (PRISMA-ScR Item 4: Objectives) in this review will be,  
186 “*what factors influence culturally responsive HIV and PrEP screening for historically*  
187 *marginalized populations?*” to explore the ways we might disrupt structures of power working  
188 against patients from minoritized groups. A secondary question will be, “*what themes and gaps*  
189 *exist in the literature regarding culturally responsive HIV and PrEP screening for historically*  
190 *marginalized populations?*” to identify areas of interest for future research.

#### 191 **Step 2: Identifying relevant studies**

192 The scoping review will be conducted across four databases (PRISMA-ScR Item 7:  
193 Information Sources): MEDLINE (PubMed), Scopus, Cochrane (CENTRAL; Wiley), and  
194 CINAHL (EBSCO). The search strategy includes the use of Medical Subject Headings (MeSH)  
195 terms and Boolean terms to clarify the parameters of the review. After conducting the searches  
196 on each database, the results will be imported into Covidence to remove duplicates and perform

197 primary screening of titles and abstracts for relevance. The full search strategy (PRISMA-ScR

198 Item 8: Search) is presented in Table 1.

199 *Table 1: Search Terms and Limitations*

| Database | Search Terms                                                                                                                                                                                                                                                                                                                                                                                                                                                                                                                                                                                                                                                                                                                                                                                                                                                                                                                                                                                                                                                                                                                                                                                                                                                                                                                                                                                                                                                                                                                                                                                                                                                                                                                                                                                                                                                                                | Limitations                                                |
|----------|---------------------------------------------------------------------------------------------------------------------------------------------------------------------------------------------------------------------------------------------------------------------------------------------------------------------------------------------------------------------------------------------------------------------------------------------------------------------------------------------------------------------------------------------------------------------------------------------------------------------------------------------------------------------------------------------------------------------------------------------------------------------------------------------------------------------------------------------------------------------------------------------------------------------------------------------------------------------------------------------------------------------------------------------------------------------------------------------------------------------------------------------------------------------------------------------------------------------------------------------------------------------------------------------------------------------------------------------------------------------------------------------------------------------------------------------------------------------------------------------------------------------------------------------------------------------------------------------------------------------------------------------------------------------------------------------------------------------------------------------------------------------------------------------------------------------------------------------------------------------------------------------|------------------------------------------------------------|
| MEDLINE  | <p>(marginalized [tiab] OR health services for transgender persons [mesh] OR health services for transgender persons [tiab] OR LGBT* [tiab] OR sexual and gender minorities [mesh] OR sexual minorit* [tiab] OR gender minorit* [tiab] OR lesbian* [tiab] OR WSW [tiab] OR women who have sex with women [tiab] OR gay [tiab] OR gays [tiab] OR MSM [tiab] OR BMSM [tiab] OR YMSM [tiab] OR men who have sex with men [tiab] OR homosexuality [mesh] OR homosexual* [tiab] OR bisexual* [tiab] OR queer* [tiab] OR nonbinary [tiab] OR intersex [tiab] OR transgender [tiab] OR transgender persons [mesh] OR minority groups [mesh] OR minorit* [tiab] OR health disparity, minority and vulnerable populations [mesh] OR ethnic and racial minorities [mesh] OR ethnic minorit* [tiab] OR racial minorit* [tiab] OR BIPOC [tiab] OR POC [tiab] OR people of color [tiab] OR black* [tiab] OR blacks [mesh] OR african americans [mesh] OR african american* [tiab] OR indigenous peoples [mesh] OR indigenous [tiab] OR health services, indigenous [mesh] OR native* [tiab] OR nation people* [tiab] OR american native continental ancestry group [mesh] OR indian* [tiab] OR inuits [mesh] OR inuit* [tiab] OR hispanic* [tiab] OR hispanic or latino [mesh] OR latin* [tiab] OR asians [mesh] OR asian* [tiab] OR asian americans [mesh] OR native hawaiian or other pacific islander [mesh] OR pacific islander* [tiab])</p> <p>AND</p> <p>(cultural* responsi* [tiab] culturally-responsive [tiab] OR culturally competent care [mesh] OR cultural* competen* [tiab] OR cultural* aware* [tiab] OR culturally-aware [tiab] OR cultural* sensitiv* [tiab] OR culturally-sensitive [tiab] OR cultural* congruen* [tiab] OR culturally-congruent [tiab] OR cross-cultur* [tiab] OR cultural* grounded* [tiab] OR inclusi* [tiab] OR competen* [tiab] OR cultural* adapt* [tiab] OR</p> | <p>English language</p> <p>2019-2022 publication years</p> |

|        |                                                                                                                                                                                                                                                                                                                                                                                                                                                                                                                                                                                                                                                                                                                                                                                                                                                                                                                                                                                                                                                                                                                                                               |                                                            |
|--------|---------------------------------------------------------------------------------------------------------------------------------------------------------------------------------------------------------------------------------------------------------------------------------------------------------------------------------------------------------------------------------------------------------------------------------------------------------------------------------------------------------------------------------------------------------------------------------------------------------------------------------------------------------------------------------------------------------------------------------------------------------------------------------------------------------------------------------------------------------------------------------------------------------------------------------------------------------------------------------------------------------------------------------------------------------------------------------------------------------------------------------------------------------------|------------------------------------------------------------|
|        | <p>culturally-adapted [tiab] OR cultural* tailor* [tiab] OR culturally-tailored [tiab] OR culturally influenced [tiab] OR affirm* [tiab] OR transcultural [tiab] OR multicultural [tiab] OR intercultural [tiab] OR cultural* litera* [tiab] OR cultural* respect* [tiab] OR cultural* appropriate* [tiab] OR cultural* accept* [tiab] OR cultural* safe* [tiab] OR cultural* intelligen* [tiab])</p> <p>AND</p> <p>(HIV [mesh] OR HIV [tiab] OR human immunodeficiency virus [tiab] OR HIV infections [mesh] OR AIDS [tiab] OR acquired immunodeficiency syndrome [mesh] OR acquired immunodeficiency syndrome [tiab])</p> <p>AND</p> <p>(screen* [tiab] OR mass screening [mesh] OR detect* [tiab] OR testing [tiab] OR diagnosis [mesh] OR diagnos* [tiab] OR prep [tiab] OR prevention [tiab] OR prevention [mesh] OR pre-exposure [tiab] OR pre [tiab])</p>                                                                                                                                                                                                                                                                                              |                                                            |
| Scopus | <p>(TITLE-ABS-KEY (marginalized) OR TITLE-ABS-KEY ("health services for transgender persons") OR TITLE-ABS-KEY (LGBT*) OR TITLE-ABS-KEY ("sexual minorit*") OR TITLE-ABS-KEY ("gender minorit*") OR TITLE-ABS-KEY (lesbian*) OR TITLE-ABS-KEY (WSW) OR TITLE-ABS-KEY ("women who have sex with women") OR TITLE-ABS-KEY (gay) OR TITLE-ABS-KEY (gays) OR TITLE-ABS-KEY (MSM) OR TITLE-ABS-KEY (BMSM) OR TITLE-ABS-KEY (YMSM) OR TITLE-ABS-KEY ("men who have sex with men") OR TITLE-ABS-KEY (homosexual*) OR TITLE-ABS-KEY (bisexual*) OR TITLE-ABS-KEY (queer*) OR TITLE-ABS-KEY (nonbinary) OR TITLE-ABS-KEY (intersex) OR TITLE-ABS-KEY (transgender) OR TITLE-ABS-KEY (minorit*) OR TITLE-ABS-KEY ("ethnic minorit*") OR TITLE-ABS-KEY ("racial minorit*") OR TITLE-ABS-KEY (BIPOC) OR TITLE-ABS-KEY (POC) OR TITLE-ABS-KEY ("people of color") OR TITLE-ABS-KEY (black*) OR TITLE-ABS-KEY ("african american*") OR TITLE-ABS-KEY (indigenous) OR TITLE-ABS-KEY (native*) OR TITLE-ABS-KEY ("nation people*") OR TITLE-ABS-KEY (indian*) OR TITLE-ABS-KEY (inuit*) OR TITLE-ABS-KEY (hispanic*) OR TITLE-ABS-KEY (latin*) OR TITLE-ABS-KEY (asian*))</p> | <p>English language</p> <p>2019-2022 publication years</p> |

|                           |                                                                                                                                                                                                                                                                                                                                                                                                                                                                                                                                                                                                                                                                                                                                                                                                                                                                                                                                                                                                                                                                                                                                                                                                                             |                                                            |
|---------------------------|-----------------------------------------------------------------------------------------------------------------------------------------------------------------------------------------------------------------------------------------------------------------------------------------------------------------------------------------------------------------------------------------------------------------------------------------------------------------------------------------------------------------------------------------------------------------------------------------------------------------------------------------------------------------------------------------------------------------------------------------------------------------------------------------------------------------------------------------------------------------------------------------------------------------------------------------------------------------------------------------------------------------------------------------------------------------------------------------------------------------------------------------------------------------------------------------------------------------------------|------------------------------------------------------------|
|                           | <p>OR TITLE-ABS-KEY (“pacific islander*”)</p> <p>AND</p> <p>(TITLE-ABS-KEY (“cultural* responsi*”) OR TITLE-ABS-KEY (“cultural* competen*”) OR TITLE-ABS-KEY (“cultural* aware*”) OR TITLE-ABS-KEY (“cultural* sensitiv*”) OR TITLE-ABS-KEY (“cultural* congruen*”) OR TITLE-ABS-KEY (cross-cultur*) OR TITLE-ABS-KEY (“cultural* grounded*”) OR TITLE-ABS-KEY (inclusi*) OR TITLE-ABS-KEY (competen*) OR TITLE-ABS-KEY (“cultural* adapt*”) OR TITLE-ABS-KEY (“cultural* tailor*”) OR TITLE-ABS-KEY (“culturally influenced”) OR TITLE-ABS-KEY (affirm*) OR TITLE-ABS-KEY (transcultural) OR TITLE-ABS-KEY (multicultural) OR TITLE-ABS-KEY (intercultural) OR TITLE-ABS-KEY (“cultural* litera*”) OR TITLE-ABS-KEY (“cultural* respect*”) OR TITLE-ABS-KEY (“cultural* appropriate*”) OR TITLE-ABS-KEY (“cultural* accept*”) OR TITLE-ABS-KEY (“cultural* safe*”) OR TITLE-ABS-KEY (“cultural* intelligen*”))</p> <p>AND</p> <p>(TITLE-ABS-KEY (HIV) OR TITLE-ABS-KEY (“human immunodeficiency virus”) OR TITLE-ABS-KEY (AIDS) OR TITLE-ABS-KEY (“acquired immunodeficiency syndrome”))</p> <p>AND</p> <p>(TITLE-ABS-KEY (screen*) OR TITLE-ABS-KEY (detect*) OR TITLE-ABS-KEY (testing) OR TITLE-ABS-KEY (diagnos*))</p> |                                                            |
| <p>Cochrane (CENTRAL)</p> | <p>((marginalized) OR (“health services for transgender persons”) OR (LGBT*) OR (“sexual minorit*”) OR (“gender minorit*”) OR (lesbian*) OR (WSW) OR (“women who have sex with women”) OR (gay) OR (gays) OR (MSM) OR (BMSM) OR (YMSM) OR (“men who have sex with men”) OR (homosexual*) OR (bisexual*) OR (queer*) OR (nonbinary) OR (intersex) OR (transgender) OR (minorit*) OR (“ethnic minorit*”) OR (“racial minorit*”) OR (BIPOC) OR (POC) OR (“people of color”) OR (black*) OR (“african american*”) OR (indigenous) OR (native*) OR (“nation people*”) OR (indian*) OR (inuit*) OR (hispanic*) OR (latin*) OR (asian*) OR (“pacific islander*”))</p> <p>AND</p> <p>(“cultural* responsi*”) OR (“cultural* competen*”) OR</p>                                                                                                                                                                                                                                                                                                                                                                                                                                                                                      | <p>English language</p> <p>2019-2022 publication years</p> |

|        |                                                                                                                                                                                                                                                                                                                                                                                                                                                                                                                                                                                                                                                                                                                                                                                                                                                                                                                                                                                                                                                                                                                                                                                                                                                                                                                                                                                                                                                                                                                                    |                                                            |
|--------|------------------------------------------------------------------------------------------------------------------------------------------------------------------------------------------------------------------------------------------------------------------------------------------------------------------------------------------------------------------------------------------------------------------------------------------------------------------------------------------------------------------------------------------------------------------------------------------------------------------------------------------------------------------------------------------------------------------------------------------------------------------------------------------------------------------------------------------------------------------------------------------------------------------------------------------------------------------------------------------------------------------------------------------------------------------------------------------------------------------------------------------------------------------------------------------------------------------------------------------------------------------------------------------------------------------------------------------------------------------------------------------------------------------------------------------------------------------------------------------------------------------------------------|------------------------------------------------------------|
|        | <p>(“cultural* aware*”) OR (“cultural* sensitiv*”) OR (“cultural* congruen*”) OR (cross-cultur*) OR (“cultural* grounded*”) OR (inclusi*) OR (competen*) OR (“cultural* adapt*”) OR (“culturally adapted”) OR (“cultural* tailor*”) OR (affirm*) OR (transcultural) OR (multicultural) OR (intercultural) OR (“cultural* litera*”) OR (“cultural* respect*”) OR (“cultural* appropriate*”) OR (“cultural* accept*”) OR (“cultural* safe*”) OR (“cultural* intelligen*”)</p> <p>AND</p> <p>((HIV) OR (“human immunodeficiency virus”) OR (AIDS) OR (“acquired immunodeficiency syndrome”))</p> <p>AND</p> <p>((screen*) OR (detect*) OR (testing) OR (diagnos*))</p>                                                                                                                                                                                                                                                                                                                                                                                                                                                                                                                                                                                                                                                                                                                                                                                                                                                                |                                                            |
| CINAHL | <p>(SU (marginalized OR health services for transgender persons OR LGBT* OR sexual minorit* OR gender minorit* OR lesbian* OR WSW OR women who have sex with women OR gay OR gays OR MSM OR BMSM OR YMSM OR men who have sex with men OR homosexual* OR bisexual* OR queer* OR nonbinary OR intersex OR transgender OR minorit* OR ethnic minorit* OR racial minorit* OR BIPOC OR POC OR people of color OR black* OR african american* OR indigenous OR native* OR nation people* OR indian* OR inuit* OR hispanic* OR latin* OR asian* OR pacific islander*) OR TI (marginalized OR health services for transgender persons OR LGBT* OR sexual minorit* OR gender minorit* OR lesbian* OR WSW OR women who have sex with women OR gay OR gays OR MSM OR BMSM OR YMSM OR men who have sex with men OR homosexual* OR bisexual* OR queer* OR nonbinary OR intersex OR transgender OR minorit* OR ethnic minorit* OR racial minorit* OR BIPOC OR POC OR people of color OR black* OR african american* OR indigenous OR native* OR nation people* OR indian* OR inuit* OR hispanic* OR latin* OR asian* OR pacific islander*) OR AB (marginalized OR health services for transgender persons OR LGBT* OR sexual minorit* OR gender minorit* OR lesbian* OR WSW OR women who have sex with women OR gay OR gays OR MSM OR BMSM OR YMSM OR men who have sex with men OR homosexual* OR bisexual* OR queer* OR nonbinary OR intersex OR transgender OR minorit* OR ethnic minorit* OR racial minorit* OR BIPOC OR POC OR people of</p> | <p>English language</p> <p>2019-2022 publication years</p> |

|  |                                                                                                                                                                                                                                                                                                                                                                                                                                                                                                                                                                                                                                                                                                                                                                                                                                                                                                                                                                                                                                                                                                                                                                                                                                                                                                                                                                                                                                              |  |
|--|----------------------------------------------------------------------------------------------------------------------------------------------------------------------------------------------------------------------------------------------------------------------------------------------------------------------------------------------------------------------------------------------------------------------------------------------------------------------------------------------------------------------------------------------------------------------------------------------------------------------------------------------------------------------------------------------------------------------------------------------------------------------------------------------------------------------------------------------------------------------------------------------------------------------------------------------------------------------------------------------------------------------------------------------------------------------------------------------------------------------------------------------------------------------------------------------------------------------------------------------------------------------------------------------------------------------------------------------------------------------------------------------------------------------------------------------|--|
|  | <p>color OR black* OR african american* OR indigenous OR native* OR nation people* OR indian* OR inuit* OR hispanic* OR latin* OR asian* OR pacific islander*) OR MH (sexual and gender minorities OR indigenous peoples OR hispanic americans OR asians OR black persons))</p>                                                                                                                                                                                                                                                                                                                                                                                                                                                                                                                                                                                                                                                                                                                                                                                                                                                                                                                                                                                                                                                                                                                                                              |  |
|  | <p>AND</p>                                                                                                                                                                                                                                                                                                                                                                                                                                                                                                                                                                                                                                                                                                                                                                                                                                                                                                                                                                                                                                                                                                                                                                                                                                                                                                                                                                                                                                   |  |
|  | <p>(SU (cultural* responsi* OR cultural* competen* OR cultural* aware* OR cultural* sensitiv* OR cultural* congruen* OR cross-cultur* OR cultural* grounded* OR inclusi* OR competen* OR cultural* adapt* OR cultural* tailor* OR culturally influenced OR affirm* OR transcultural OR multicultural OR intercultural OR cultural* litera* OR cultural* respect* OR cultural* appropriate* OR cultural* accept* OR cultural* safe* OR cultural* intelligen*) OR TI (cultural* responsi* OR cultural* competen* OR cultural* aware* OR cultural* sensitiv* OR cultural* congruen* OR cross-cultur* OR cultural* grounded* OR inclusi* OR competen* OR cultural* adapt* OR cultural* tailor* OR culturally influenced OR affirm* OR transcultural OR multicultural OR intercultural OR cultural* litera* OR cultural* respect* OR cultural* appropriate* OR cultural* accept* OR cultural* safe* OR cultural* intelligen*) OR AB (cultural* responsi* OR cultural* competen* OR cultural* aware* OR cultural* sensitiv* OR (cultural* congruen* OR cross-cultur* OR cultural* grounded* OR inclusi* OR competen* OR cultural* adapt* OR cultural* tailor* OR culturally influenced OR affirm* OR transcultural OR multicultural OR intercultural OR cultural* litera* OR cultural* respect* OR cultural* appropriate* OR cultural* accept* OR cultural* safe* OR cultural* intelligen*) OR MH (cultural competence OR transcultural care))</p> |  |
|  | <p>AND</p>                                                                                                                                                                                                                                                                                                                                                                                                                                                                                                                                                                                                                                                                                                                                                                                                                                                                                                                                                                                                                                                                                                                                                                                                                                                                                                                                                                                                                                   |  |
|  | <p>(SU (HIV OR human immunodeficiency virus OR AIDS OR acquired immunodeficiency syndrome) OR TI (HIV OR human immunodeficiency virus OR AIDS OR acquired immunodeficiency syndrome) OR AB (HIV OR human immunodeficiency virus OR AIDS OR acquired immunodeficiency syndrome) OR MH (human immunodeficiency virus OR acquired immunodeficiency syndrome))</p>                                                                                                                                                                                                                                                                                                                                                                                                                                                                                                                                                                                                                                                                                                                                                                                                                                                                                                                                                                                                                                                                               |  |
|  | <p>AND</p>                                                                                                                                                                                                                                                                                                                                                                                                                                                                                                                                                                                                                                                                                                                                                                                                                                                                                                                                                                                                                                                                                                                                                                                                                                                                                                                                                                                                                                   |  |

|  |                                                                                                                                                                                 |  |
|--|---------------------------------------------------------------------------------------------------------------------------------------------------------------------------------|--|
|  | (SU (screen* OR detect* OR testing OR diagnos*) OR TI (screen* OR detect* OR testing OR diagnos*) OR AB (detect* OR testing OR diagnos*) OR MH (diagnosis OR health screening)) |  |
|--|---------------------------------------------------------------------------------------------------------------------------------------------------------------------------------|--|

200 **Step 3: Selecting Studies**

201 **Inclusion Criteria**

202 The search will be limited (PRISMA-ScR Item 6: Eligibility Criteria) to studies that  
203 concern screening services, specifically regarding HIV and/or PrEP. In addition to the search  
204 strategy delineated above (**Table 1**), studies will be included in the review if they meet the  
205 following inclusion criteria:

- 206  Published, peer-reviewed research articles
- 207  Studies published in English
- 208  Studies that consider data collected in the U.S./in the context of U.S. health  
209 systems

210 **Exclusion Criteria**

211 Studies that meet the following exclusion criteria will be excluded from the review:

- 212  Studies where the team cannot obtain full-text articles
- 213  Book chapters and study protocols
- 214  Studies published in a language other than English
- 215  Studies published prior to 2019
- 216  Data collected from any country other than the U.S., except for systematic  
217 reviews

218           ☐ Studies that do not address one or more of our historically marginalized  
219           populations of interest or studies that do not discuss people of unknown or  
220           negative HIV status

221           Results will be limited to published, peer-reviewed studies to create a standard for  
222           included articles, as they will not be assessed for quality of evidence. Results must have been  
223           published in English, as the team does not have the resources to translate foreign language  
224           studies. Further, since our training intervention seeks to improve outcomes among patients in the  
225           U.S. by understanding barriers and facilitators among U.S.-based PCPs, results will be limited to  
226           studies that were conducted in the U.S. or that concern U.S. health systems. Study protocols will  
227           be excluded because they are not predicted to be of use, and book chapters will be excluded to  
228           avoid the use of non-peer-reviewed materials. Since the intervention ultimately informed by this  
229           scoping review is two-pronged and targets both HIV and COVID-19 screening, included studies  
230           will be limited to those published between the years 2019-2022 (mirroring the timeline of the  
231           COVID-19 pandemic), rather than including HIV-related research from the past four decades.  
232           Finally, since this review will inform interventions regarding HIV and/or PrEP screening for  
233           patients from racial, ethnic, sexual, and gender minority backgrounds, studies must focus on at  
234           least one of these groups, and must include. Articles will necessarily be limited to those that  
235           include individuals of negative or unknown HIV status, because these are the patients who are  
236           eligible to be screened for HIV and PrEP.

237           Results will be uploaded to Covidence, a screening and data extraction tool, to eliminate  
238           duplicate studies, followed by two stages of screening: a title/abstract screening, followed by a  
239           full-text screening (PRISMA-ScR Item 9: Selection of Sources of Evidence). The primary  
240           reviewers (JX, NK) will screen all the results against the inclusion and exclusion criteria and



241 must agree to include or exclude a study to make a decision. Senior reviewers (PM and PC) will  
242 resolve disagreements. After completing the title/abstract screening, reviewers (JX, NK, SP, DB)  
243 will perform a full-text screening on the remaining studies and further eliminate irrelevant  
244 studies, and PM and PC will provide guidance and reconciliation as required. To assess interrater  
245 reliability, all reviewers will informally screen the same several articles at the start of both  
246 title/abstract screening and full-text screening phases and come together to discuss the  
247 criteria/process used to include or exclude studies.

#### 248 **Step 4: Charting the data**

249 After studies have undergone a full-text screening, data will be extracted and charted by  
250 nine reviewers (JX, NK, SP, DB, SS, PC, AK, MW, PM) (PRISMA-ScR Item 10: Data Charting  
251 Process). The data items for extraction (PRISMA-ScR Item 11: Data Items) were developed  
252 through an iterative process that consulted team members and created a working definition of  
253 each item to streamline the extraction process. Checkboxes were chosen over text fields for  
254 several items to minimize variability among different reviewer inputs. The data that will be  
255 charted includes:

- 256  Reviewer
- 257  Covidence ID
- 258  Author(s)
- 259  Publication title
- 260  Publication year
- 261  Study location
- 262  Study design
- 263  Intervention type

- 264 ☐ Timeframe of study
- 265 ☐ Study aims
- 266 ☐ Study population
- 267 ☐ Methodology overview
- 268 ☐ Measures
- 269 ☐ Results
- 270 ☐ Level of communication addressed
- 271 ☐ How does it address Black Indigenous, and People of Color (BIPOC) groups?
- 272 ☐ How does it address lesbian, gay, bisexual, transgender, queer/questioning, intersex, and
- 273 asexual (LGBTQIA+) groups?
- 274 ☐ What aspects of cultural responsiveness are addressed?
- 275 ☐ Facilitators to culturally responsive communication identified
- 276 ☐ Barriers to culturally responsive communication identified
- 277 ☐ Implications
- 278 ☐ What is left unanswered?
- 279 ☐ Limitations or biases

## 280 **Results**

### 281 **Step 5: Collating, summarizing, and reporting the results**

282       After extraction, reviewers will quantify mentions of specific barriers and facilitators to  
283 identify their prevalence, then pull quotations from each included study to describe each  
284 identified influence. The implications extracted from each study will be analyzed for themes  
285 related to culturally responsive HIV and PrEP screening practices for historically marginalized  
286 populations. The data will be reviewed to identify how each study contributes to our

287 understanding of the primary research question. Additionally, the review will identify any gaps  
288 in existing literature and opportunities for future research in this field. This analysis will not  
289 include a systematic evaluation of study quality or risk of bias, because this scoping review aims  
290 to focus on the scope and breadth, rather than the quality of available literature. After analysis,  
291 results will be synthesized and reported according to PRISMA-ScR guidelines (Item 13:  
292 Synthesis of Results; Items 15-19), and the process used to select studies will be detailed in a  
293 PRISMA flowchart (PRISMA-ScR Item 14: Selection of Sources of Evidence).

## 294 **Discussion**

295 Culturally responsive HIV screening conversations between PCPs and minoritized groups  
296 are key to bridging the stark existing disparities in HIV morbidity and mortality in the U.S. To  
297 our knowledge, this is the first study to use scoping methods to investigate the barriers and  
298 facilitators to culturally responsive HIV and PrEP screening for minoritized populations. After  
299 mapping the landscape, gaps, and themes of current research, we plan to disseminate our  
300 findings in publication and through the development of relevant and evidence-based training  
301 programs to help PCPs routinize culturally responsive HIV and PrEP screening for minoritized  
302 groups. Additionally, we anticipate that this study will yield implications important to the work  
303 of activists, researchers, patients, and public health professionals in this field. The limitations of  
304 this study include that as a scoping review, our review does not assess the depth, quality, or risk  
305 of bias of the studies the way a systematic review would. Additionally, by limiting the timeline  
306 of this review to the years 2019-2022, we may miss valuable studies that were performed before  
307 this timeframe.

308

309

310 **Funding**

311 Funding made available by Gilead Sciences Inc.

312

313 **Institutional Review Board Statement**

314 This project did not utilize human subjects, was exempted from needing IRB approval, and  
315 therefore did not involve a process of informed consent. This manuscript exclusively provides an  
316 overview of a scoping review protocol. The data from this scoping review will be used to inform  
317 and strengthen an educational intervention that will be IRB-approved and supported by grant  
318 funding.

319

320 **Conflict of Interest**

321 The authors declare no conflict of interest.

322

323 **Acknowledgments**

324 The authors would like to acknowledge Thomas Harrod, Associate Director of Reference,  
325 Instruction, and Access at the George Washington University's Himmelfarb Health Sciences  
326 Library for his generous guidance and support in developing the search strategies for this scoping  
327 review and Stacy Brody, Reference and Instruction Librarian at the George Washington  
328 University's Himmelfarb Health Sciences Library for her guidance in creating the manuscript for  
329 this publication. The authors would like to acknowledge Saylor Pershing, Darrell Bailey, Sheel  
330 Singh, and Abigail Konopasky for their assistance in the text screening and extraction process.

331

## References

- 332
- 333
- 334
- 335
- 336
- 337
- 338
- 339
- 340
- 341
- 342
- 343
- 344
- 345
- 346
- 347
- 348
- 349
- 350
- 351
- 352
- 353
1. Tucker CM, Marsiske M, Rice KG, Nielson JJ, Herman K. Patient-centered culturally sensitive health care: Model testing and refinement. *Health Psychology*. 2011;30(3):342-350. doi:10.1037/a0022967
  2. Cultural competence in Health and Human Services. NPIN. <https://npin.cdc.gov/pages/cultural-competence>. Accessed December 2, 2022.
  3. Brown L, Spinelli M, Gandhi M. The interplay between HIV and COVID-19: Summary of the data and responses to date. *Current Opinion in HIV and AIDS*. 2021; 16 (1): 63-73. doi: 10.1097/COH.0000000000000659.
  4. Basic statistics | HIV basics | HIV/AIDS. CDC. <https://www.cdc.gov/hiv/basics/statistics.html>. Published June 21, 2022. Accessed December 2, 2022.
  5. *HIV infection, risk, prevention, and testing behaviors among transgender women—National HIV behavioral surveillance, 7 U.S. cities, 2019–2020*. CDC; 2021. <https://www.cdc.gov/hiv/library/reports/hiv-surveillance.html>.
  6. U. S. census bureau quickfacts: United States. <https://www.census.gov/quickfacts/fact/table/US/PST045221>. Accessed December 2, 2022.
  7. U. S. statistics. HIV.gov. <https://www.hiv.gov/hiv-basics/overview/data-and-trends/statistics>. Accessed December 2, 2022.
  8. Ending the HIV epidemic | Overview. HIV.gov. <https://www.hiv.gov/federal-response/ending-the-hiv-epidemic/overview>. Accessed December 2, 2022.

- 354 9. Preexposure prophylaxis for the prevention of HIV infection in the United States – 2021  
355 update: A clinical practice guideline. CDC. [https://www.cdc.gov/hiv/pdf/risk/prep/cdc-](https://www.cdc.gov/hiv/pdf/risk/prep/cdc-hiv-prep-guidelines-2021.pdf)  
356 [hiv-prep-guidelines-2021.pdf](https://www.cdc.gov/hiv/pdf/risk/prep/cdc-hiv-prep-guidelines-2021.pdf). Published December 8, 2021. Accessed December 28,  
357 2022
- 358 10. Monitoring selected national HIV prevention and care objectives by using HIV  
359 surveillance data United States and 6 dependent areas, 2020. CDC.  
360 <https://www.cdc.gov/hiv/library/reports/hiv-surveillance/vol-27-no-3/index.html>.  
361 Published August 26, 2022. Accessed December 2, 2022.
- 362 11. Branson BM, Handsfield HH, Lampe MA, et al. *Revised recommendations for HIV*  
363 *testing of adults, adolescents, and pregnant women in health-care settings*. MMWR  
364 2006; 55(RR14);1-17. <https://www.cdc.gov/mmwr/preview/mmwrhtml/rr5514a1.htm>.  
365 Accessed December 1, 2022.
- 366 12. Hoover KW, Huang YA, Tanner ML, et al. *HIV testing trends at visits to physician*  
367 *offices, community health centers, and emergency departments — United States, 2009–*  
368 *2017*. MMWR 2020; 69(25):776-780. doi:10.15585/mmwr.mm6925a2
- 369 13. Arksey H, O’Malley L. Scoping studies: Towards a methodological framework.  
370 *International Journal of Social Research Methodology*. 2005;8(1):19-32.  
371 doi:10.1080/1364557032000119616
- 372 14. Tricco AC, Lillie E, Zarin W, et al. PRISMA extension for scoping reviews (PRISMA-  
373 ScR): Checklist and explanation. *Ann Intern Med*. 2018;169(7):467-473.  
374 doi:10.7326/M18-0850
